# Supplementary material
Source: PubMed Central journal article supplement (PMC6506359)
Supplement: NIHMS1518395-supplement-2.pdf [file NIHMS1518395-supplement-2.pdf]

## Supplementary figure and legends

Figure S1:

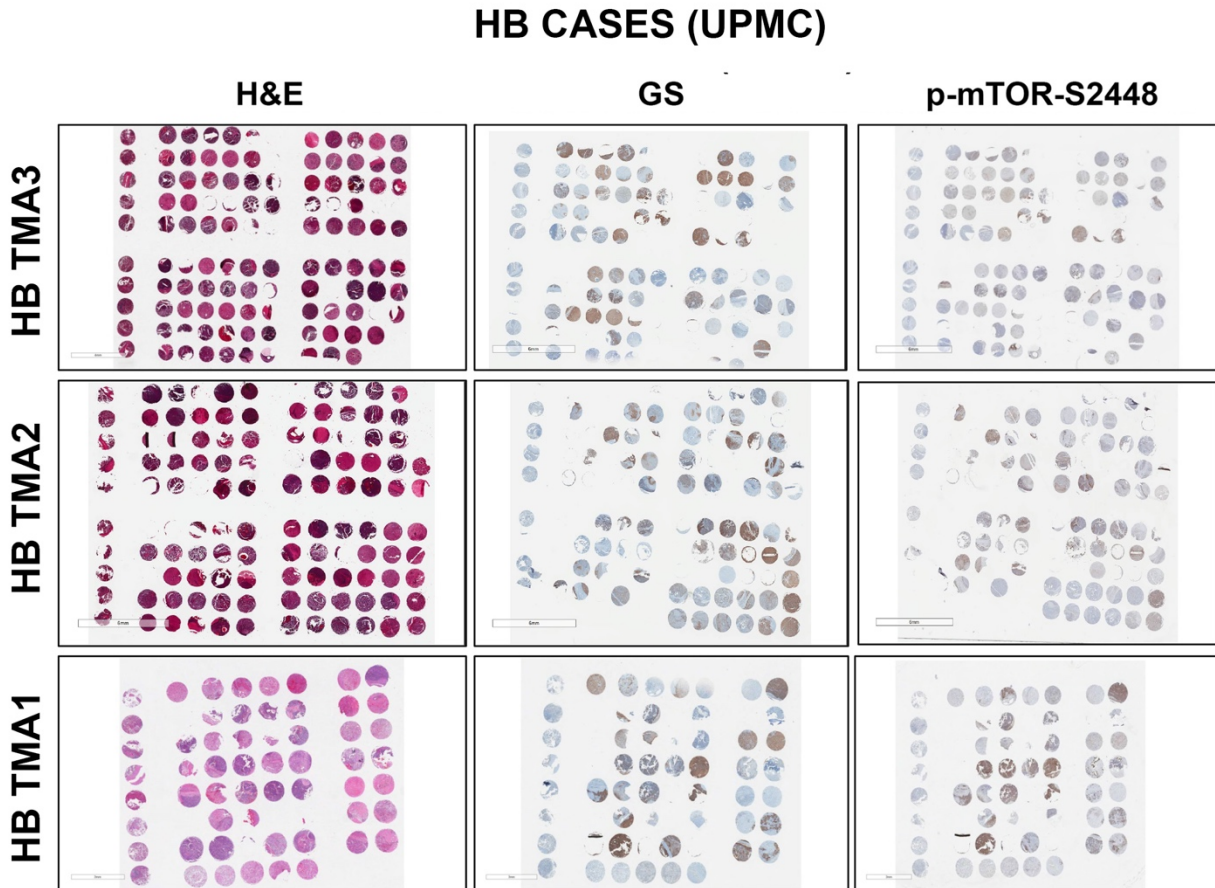

**Figure S1: Related to Figure 2. Hepatoblastoma (HB) tissue microarrays (TMAs) stained for GS and p-mTOR-S2448.** Three HB TMAs with 55 usable samples were stained for GS and p-mTOR-S2448 to address any correlation between the two proteins. Each HB had multiple histological components including fetal, crowded fetal, embryonal and others. A total of 113 components were identified in the 55 cases. H&E was done to address histology and is presented in the left column for the corresponding TMAs.

Figure S2:

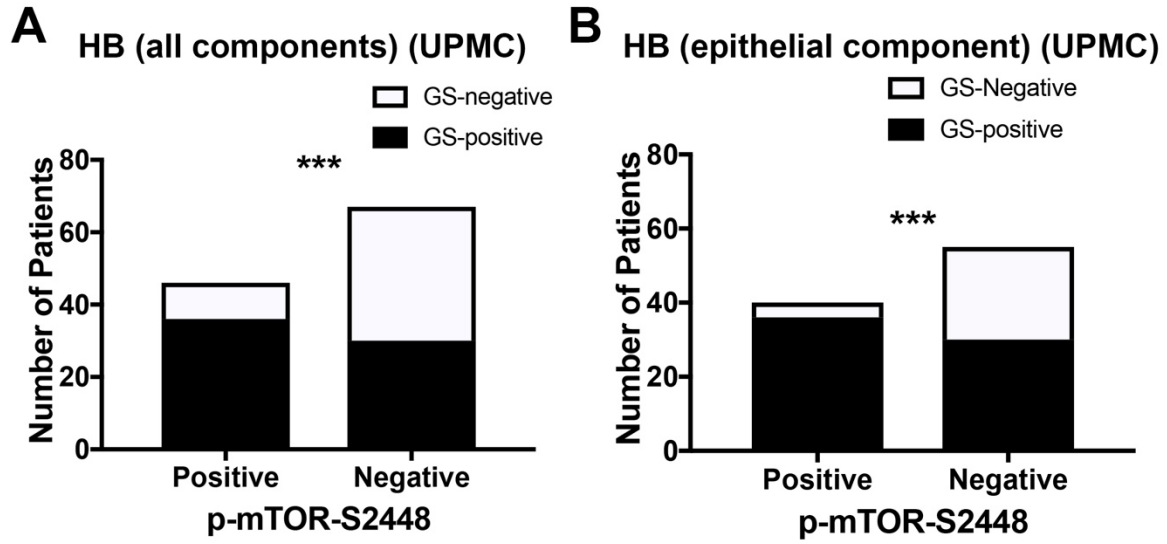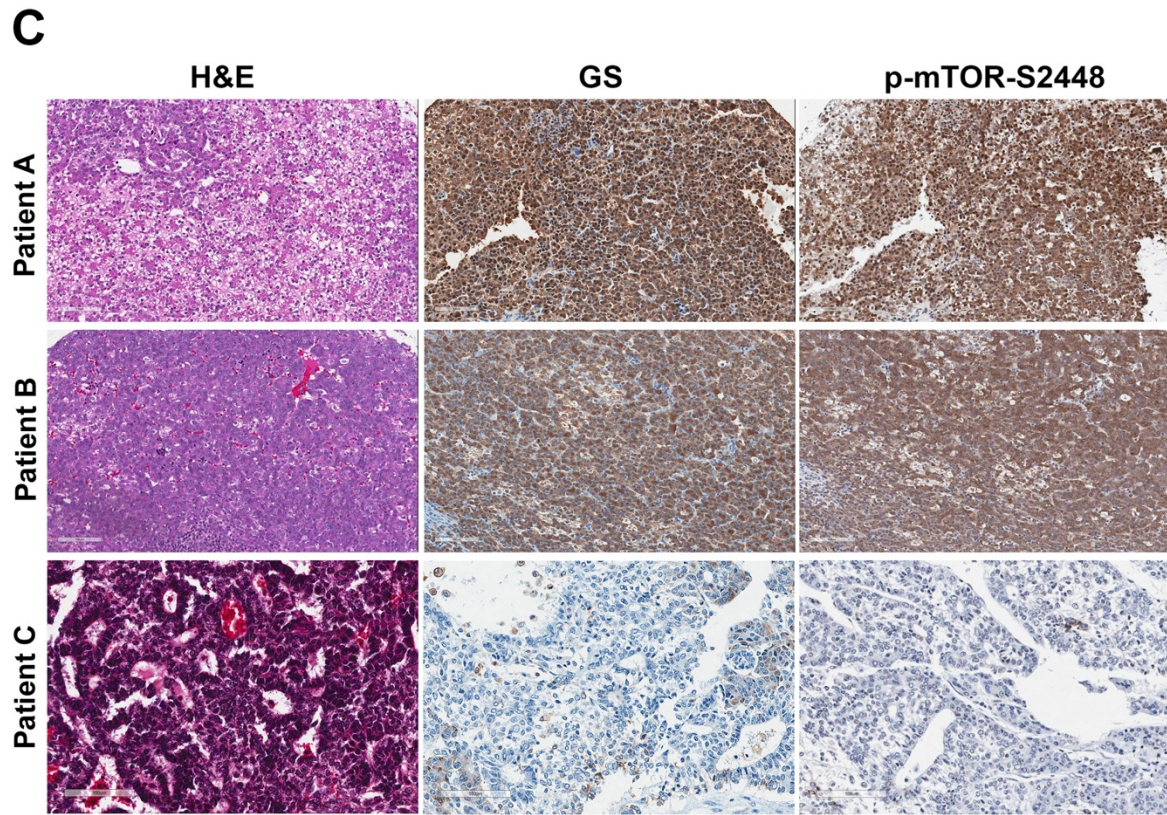

**Figure S2: Related to Figure 2. Significant correlation between IHC for GS and p-mTOR-S2448 in HB patients.**

- A. 32% of all HB components (n=113) within the 55 HB cases at Children's Hospital Pittsburgh, were simultaneously positive for GS and p-mTOR-S2448. Bar graph representing Fisher's Exact test showed a significant correlation between GS and p-mTOR-S2448 staining in these samples (\*\*p=4.52E-4; 2-sided test).
- B. 38% of only epithelial components of the HB (n=95) in the 55 cases showed simultaneously positivity for GS and p-mTOR-S2448 while 25 cases were negative for both these markers. Fisher's Exact test showed a significant correlation between GS and p-mTOR-S2448 (\*\*p=2.36E-4, 2-sided test).
- C. Representative IHC of HB samples from the Children's Hospital Pittsburgh showing simultaneous positivity (Patient A and B) or negativity (Patient C) for GS and p-mTOR-S2448 (50x).



Figure S3:

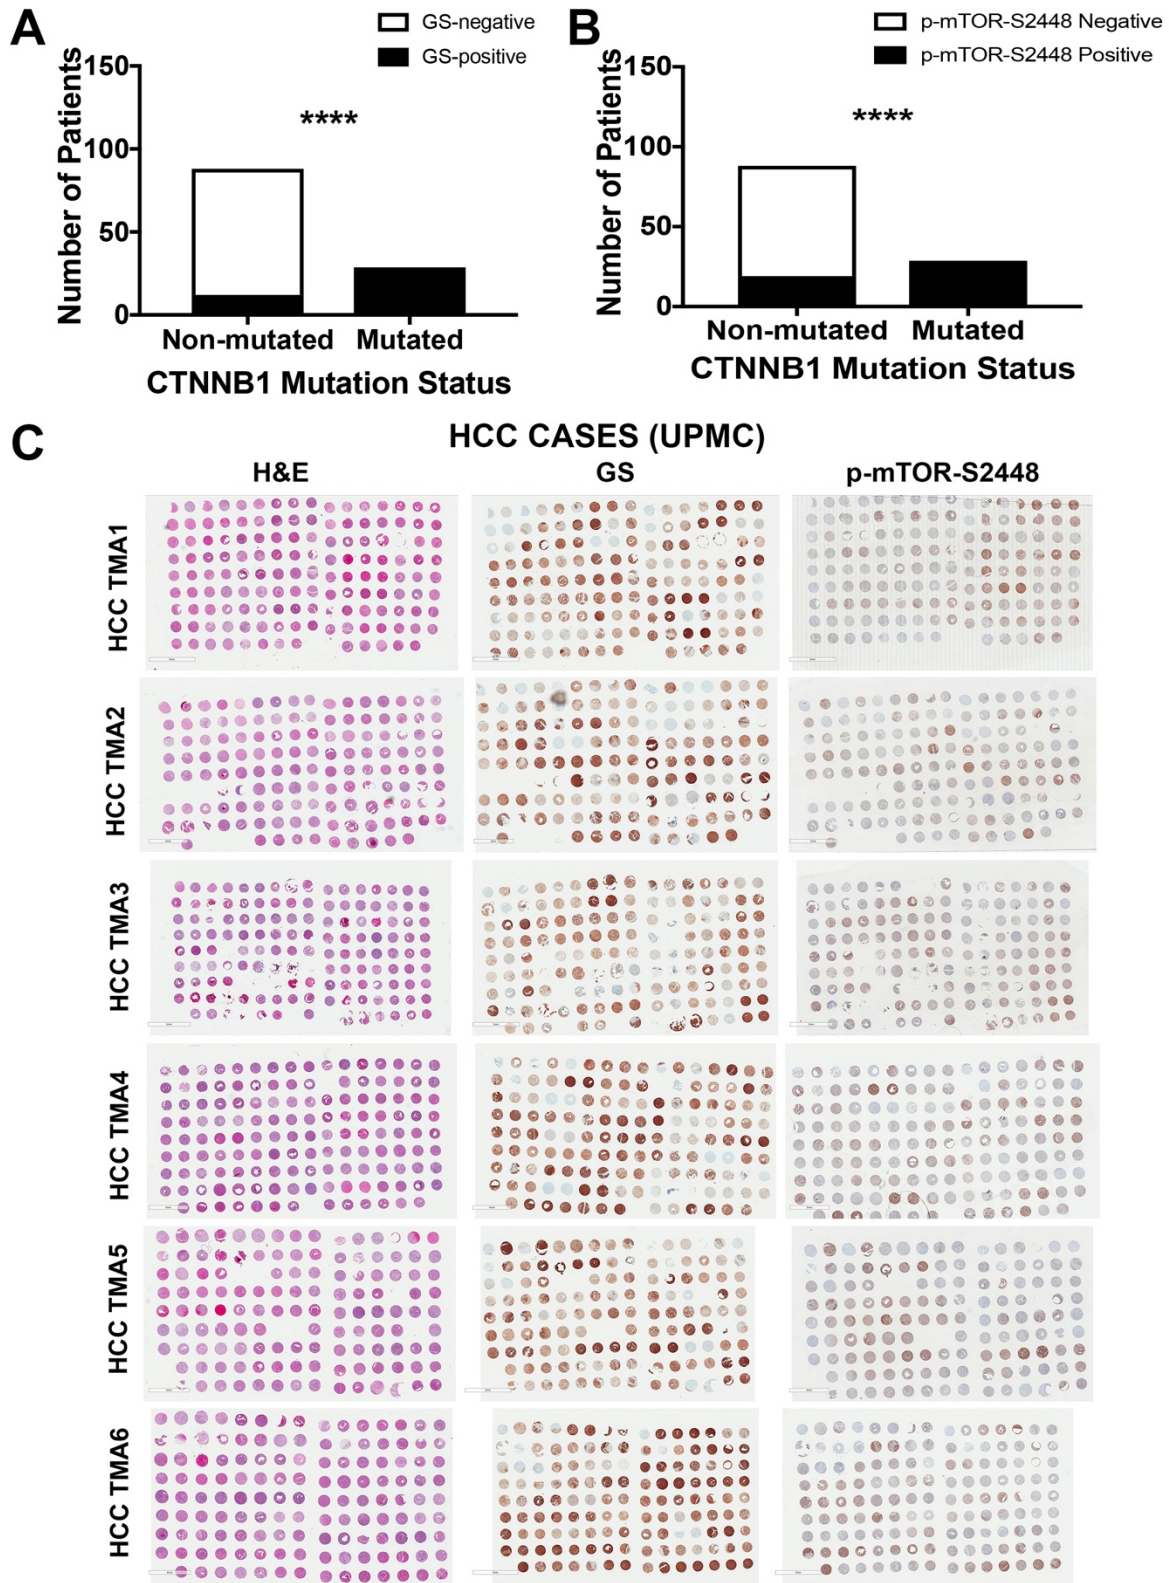

**Figure S3: Related to Figure 2. HCC TMAs from University of Pittsburgh Medical Center stained for GS and p-mTOR-S2448.** Six HCC TMAs with 252 usable samples were stained for GS and p-mTOR-S2448 to address any correlation between the two proteins. H&E was done to address histology and is presented in the left column for the corresponding TMAs.

Figure S4:

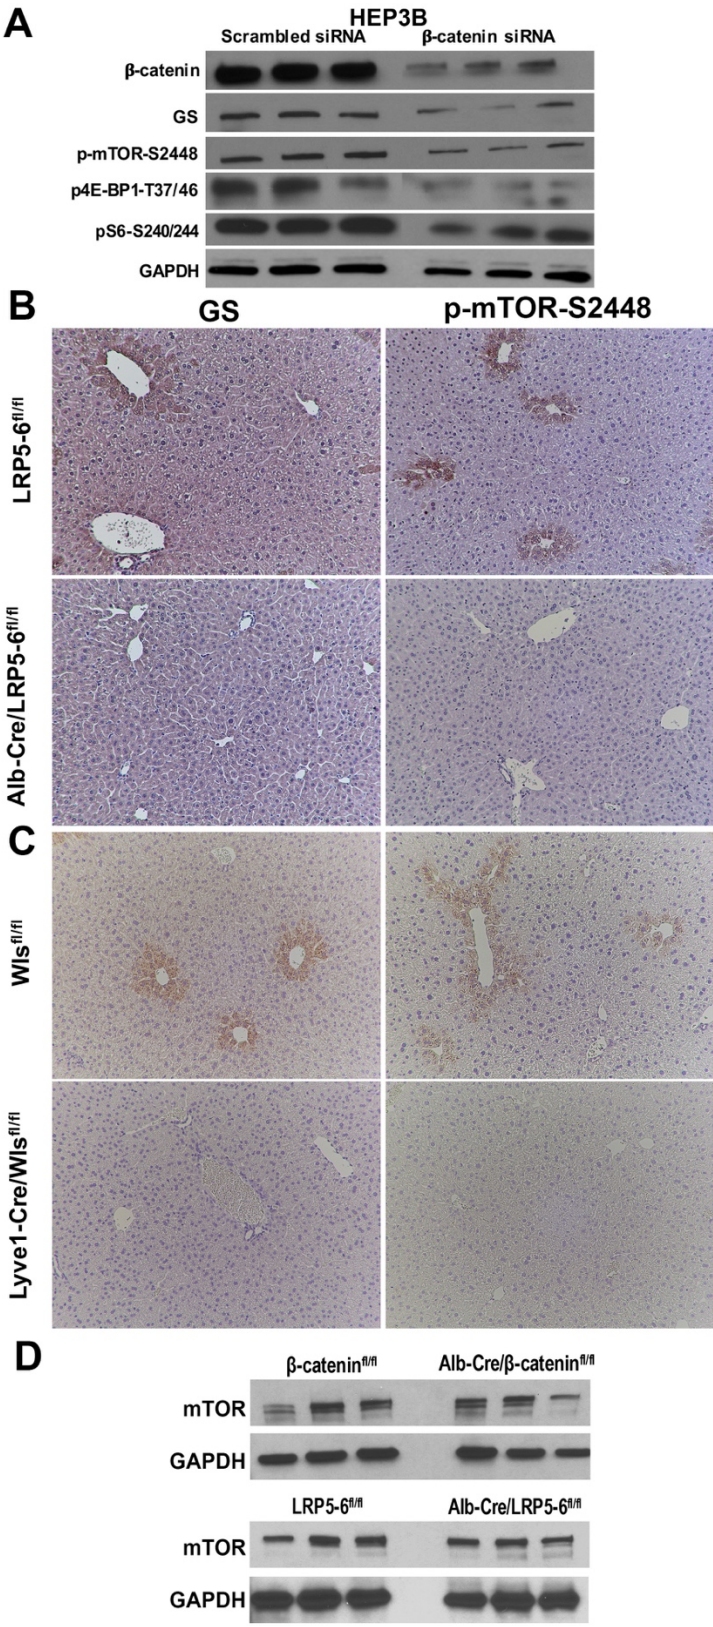

**Figure S4: Related to Figure 3. Loss of Wnt/ $\beta$ -catenin signaling affected GS and p-mTOR-S2448 protein while no change in total mTOR levels were evident.**

- A. SiRNA-mediated knockdown of  $\beta$ -catenin gene for 48 hours in the Hep3B cells resulted in notable loss of  $\beta$ -catenin, GS, p-mTOR-S2448, p-S4E-BP1-T37/46 and pS6-S240/244 while GAPDH verified comparable protein loading in the WB.
- B. Conditional deletion of Wnt co-receptors LRP5-6 from hepatocytes in the Alb-Cre/LRP5-6<sup>fl/fl</sup> mice leads to absent staining of the pericentral hepatocytes for not only GS but also for p-mTOR-S2448 (bottom), which are both evident in the livers from littermate LRP5-6<sup>fl/fl</sup> mice (top) (100x).
- C. Conditional deletion of Wntless from hepatic endothelial cells in the Lyve1-Cre/Wls<sup>fl/fl</sup> leads to absent staining of the pericentral hepatocytes for not only GS but also for p-mTOR-S2448 (bottom), which are both evident in the livers from littermate Wls<sup>fl/fl</sup> mice (top) (100x).
- D. WB using whole cell lysates from the livers of Alb-Cre/ $\beta$ -catenin<sup>fl/fl</sup> and  $\beta$ -catenin<sup>fl/fl</sup> mice or Alb-Cre/LRP5-6<sup>fl/fl</sup> and LRP5-6<sup>fl/fl</sup> mice shows no change in total mTOR protein levels by WB. Comparable loading was verified by GAPDH.



Figure S5:

**A**

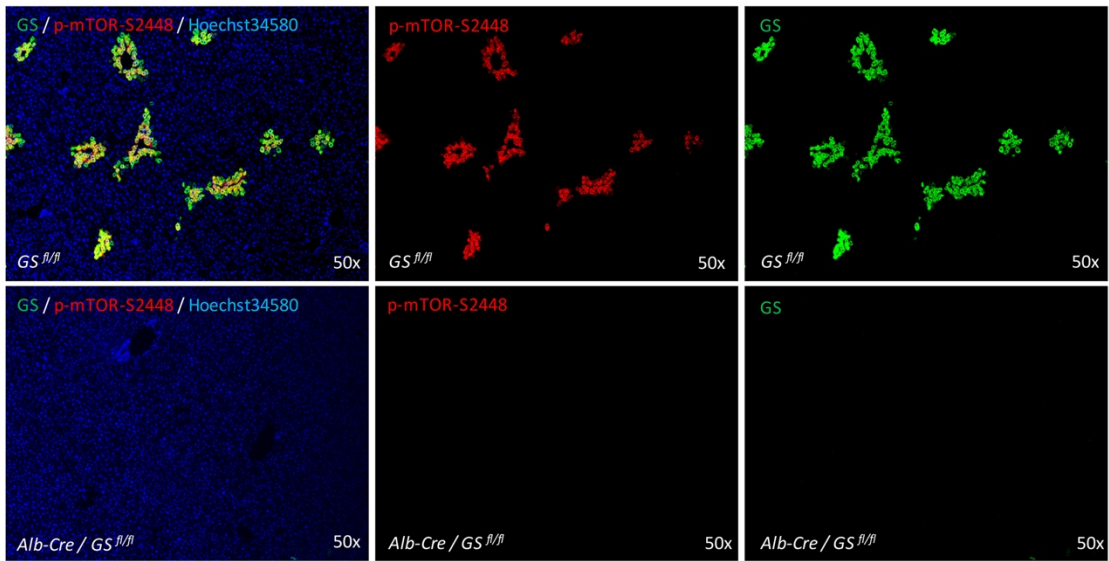

**B**

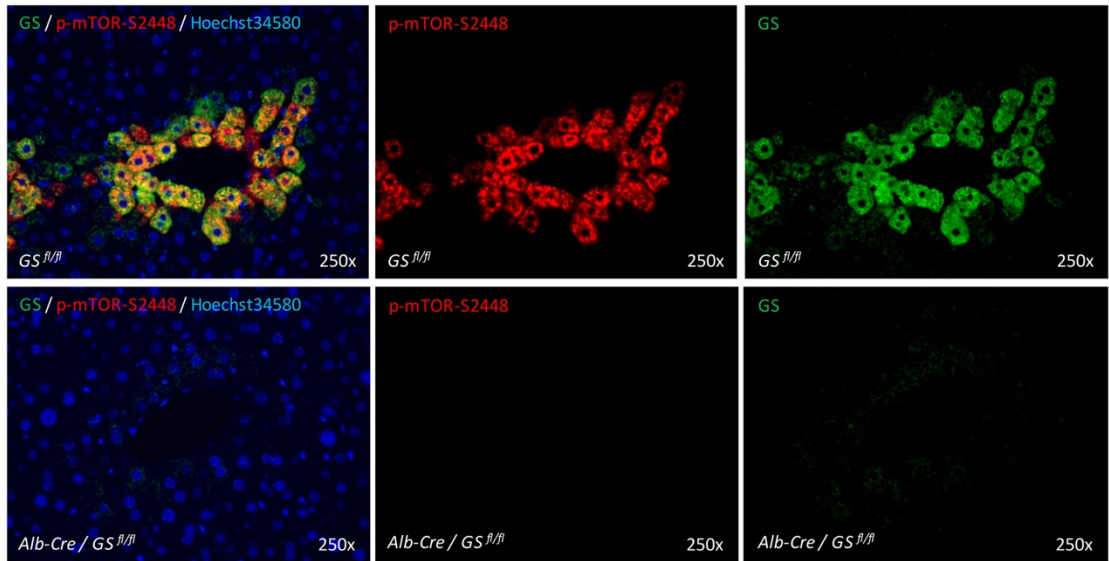

**C**

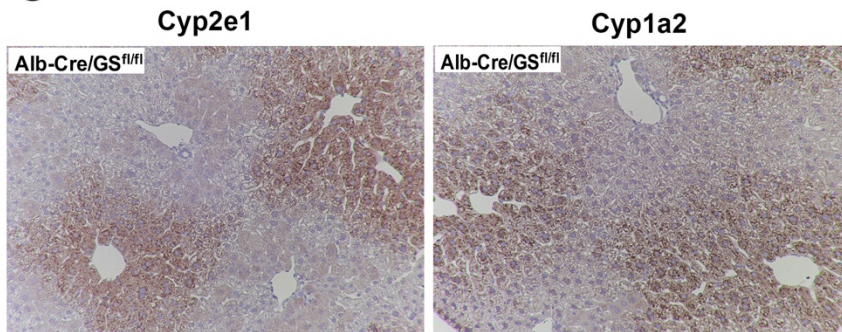

**D**

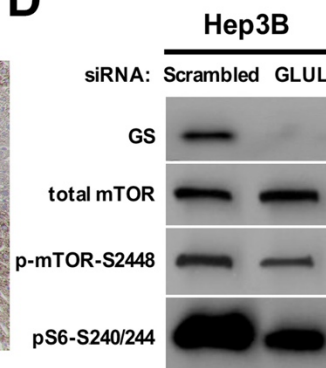



**Figure S5: Related to Figure 4. Loss or knockdown of GS from liver cells affects p-mTOR-S2448 levels and signaling without affecting other Wnt/ $\beta$ -catenin signaling targets, both *in vitro* and *in vivo*.**

- A. Double immunofluorescence shows colocalization of GS and p-mTOR-S2448 in the GS<sup>fl/fl</sup> mice (top), while no staining is seen for either in the Alb-Cre/GS<sup>fl/fl</sup> livers (bottom) (50x).
- B. Double immunofluorescence shows colocalization of GS and p-mTOR-S2448 in the GS<sup>fl/fl</sup> mice (top), while no staining is seen for either in the Alb-Cre/GS<sup>fl/fl</sup> livers (bottom) (200x).
- C. IHC on the Alb-Cre/GS<sup>fl/fl</sup> livers for the Wnt/ $\beta$ -catenin targets cyp2e1 and cyp1a2 shows intact staining in several layers of hepatocytes around central vein showing normal Wnt/ $\beta$ -catenin signaling in the absence of GS in hepatocytes.
- D. SiRNA-mediated knockdown of GS gene (Glul) for 48 hours in the Hep3B cells resulted in notable losses of GS, p-mTOR-S2448 and pS6-S240/244 without affecting total mTOR levels as shown in a representative WB. GAPDH verified comparable protein loading.

Figure S6:

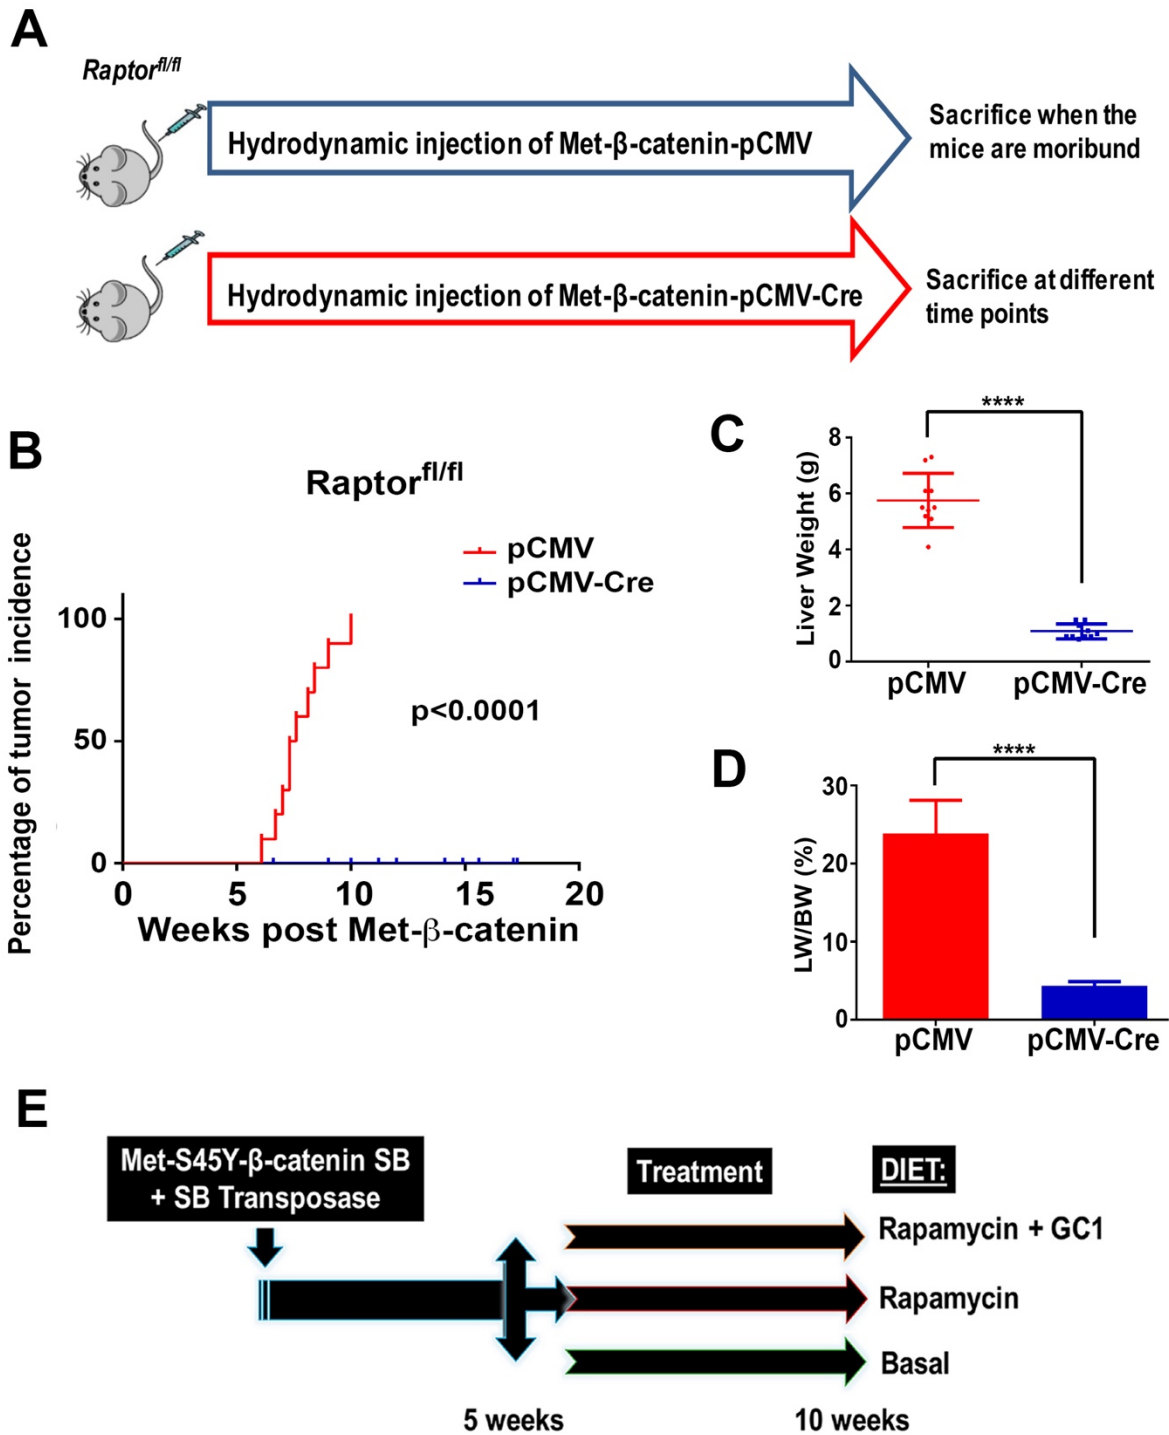

**Figure S6: Related to Figures 5, 6 and 7. Schematic showing establishment of Met- $\beta$ -catenin models for mTORC1 inhibition using genetic or drug treatment approaches.**

- A. Study design showing use of Raptor<sup>fl/fl</sup> (Exon-6) mice for delivering Met- $\beta$ -catenin via SB-HTVI along with pCMV or pCMV-cre in 10 mice for each group for assessing effect of mTORC1 inactivation on HCC development.
- B. A significant decrease in tumor incidence in Met- $\beta$ -catenin-pCMV-Cre injected Raptor<sup>fl/fl</sup> mice as compared to Met- $\beta$ -catenin-pCMV injected Raptor<sup>fl/fl</sup> mice (n=10/group) (p<0.0001).
- C. A significant decrease in the liver weight of the Raptor<sup>fl/fl</sup> mice injected with Met- $\beta$ -catenin-pCMV-Cre as compared to the Met- $\beta$ -catenin-pCMV-injected group. Data are presented as mean  $\pm$  SD. (\*\*\*\*p<0.0001).
- D. A significant decrease in the liver weight/body weight ratio (LW/BW %) of the Raptor<sup>fl/fl</sup> mice injected with Met- $\beta$ -catenin-pCMV-Cre as compared to the Met- $\beta$ -catenin-pCMV-injected group. Data are presented as mean  $\pm$  SD. (\*\*\*\*p<0.0001).
- E. Schema depicting establishment of the Met- $\beta$ -catenin HCC model and randomization at 5 weeks after injection of the plasmids into three groups. The control group had access to basal diet (n=5), and experimental groups had access to either Rapamycin containing diet (18mg/kg) only (n=8) or access to a combination diet containing Rapamycin (18mg/kg) and Sobiterome or GC1 (5mg/kg) (n=8). All mice were euthanized at 5 weeks after treatment for analysis.



Figure S7:

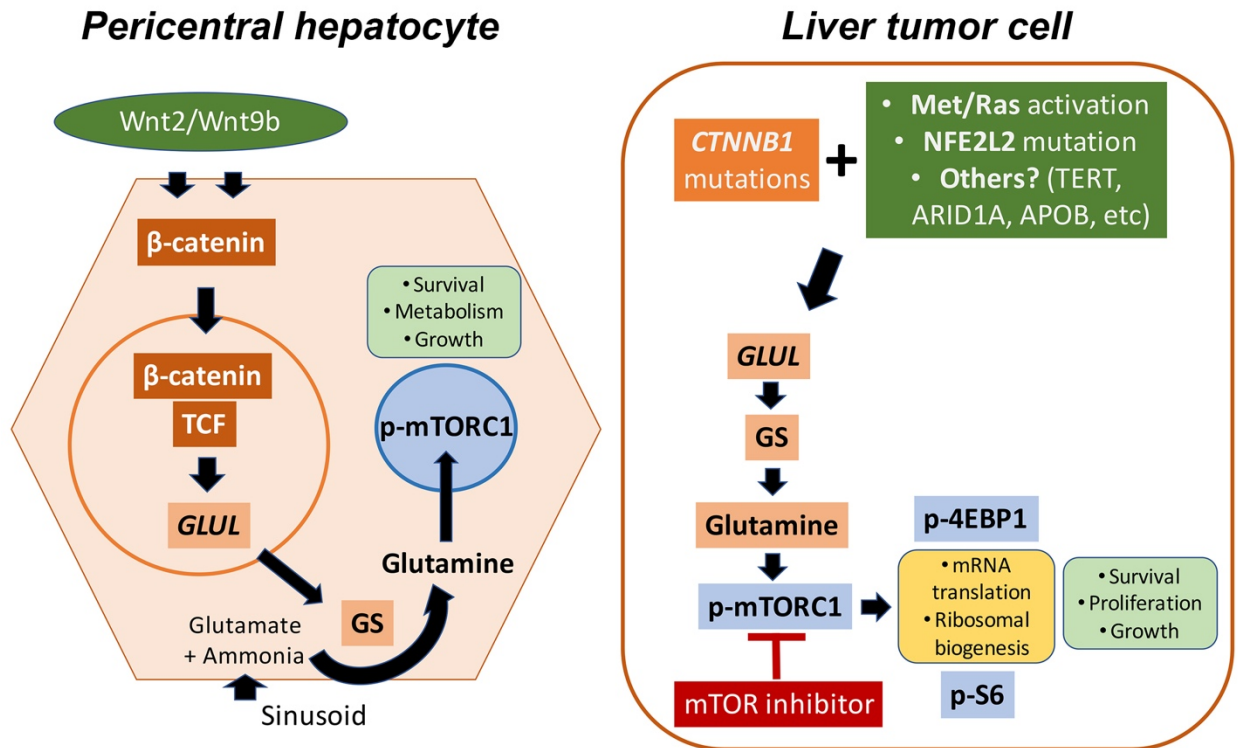

**Figure S7: Related to Figures 2, 3 and 5. Schematic showing summary of Wnt-β-catenin-GS-Glutamine-mTORC1 axis in hepatic pathophysiology.** Left panel shows the Wnt-mTORC1 axis in pericentral hepatocyte where the most upstream Wnts (2 and 9b) are released constitutively from central vein endothelial cells to persistently stabilize and activate β-catenin-TCF-dependent expression of *GLUL* and in turn increased GS which condenses ammonia taken up from sinusoidal blood with Glutamate yielding Glutamine. Glutamine can translocate into lysosome to directly induce phosphorylation of p-mTOR at S2448 and cause mTORC1 activation and may contribute to several biologic processes inherent to zone 3 of liver lobule. The right panel represents liver tumor cell in which mutations in β-catenin gene cooperate with other aberrations to also lead to GS upregulation which eventually leads to increased Glutamine that in turn

constitutively activated mTORC1. Such metabolic addiction of *CTNNB1*-mutated HCC to mTORC1 can be therapeutically exploited by use of mTOR inhibitors.

## Supplementary tables

**Table S1: Related to Figure 2. Demographics and additional information on hepatoblastoma patients represented on the 3 tissue microarrays from Children's Hospital, Pittsburgh.**

| S. No. | HB. No. | Age  | Gender | Biopsy/<br>Resection | Histology | GS  | p-mTOR<br>-S2448 | Miscellaneous |
|--------|---------|------|--------|----------------------|-----------|-----|------------------|---------------|
| 1      | HB2B    | 9m   | F      | R                    | CF        | 3+  | 2+               | AWOD          |
|        |         |      |        |                      | E         | 2+  | Neg              |               |
| 2      | HB3B    | 51M  | F      | R/M                  | CF        | 2+  | 3+               | AWOD          |
|        | HB3C    |      |        |                      | CF        | 3+  | 3+               |               |
| 3      | HB6A    | 6M   | F      | B                    | CF        | 3+  | 2+               | DOD           |
|        |         |      |        |                      | E         | Neg | Neg              |               |
|        | HB6B    |      |        |                      | WDF       | 3+  | 1+               |               |
|        | HB6C    |      |        |                      | CF        | 3+  | 2+               |               |
|        |         |      |        |                      | E         | Neg | Neg              |               |
| 4      | HB9A    | 48M  | M      | R                    | CF-MT     | 3+  | 2+               | AWOD          |
|        |         |      |        |                      | PF        | Neg | Neg              |               |
| 5      | HB10    | 15M  | M      | R                    | CF        | 3+  | 2+               | AWOD          |
|        |         |      |        |                      | E         | Neg | Neg              |               |
| 6      | HB14    | 108M | F      | R                    | CF        | 3+  | 3+               | DOD           |
| 7      | HB16    | 12M  | F      | R                    | CF        | 2+  | 2+               | AWOD          |
|        |         |      |        |                      | E         | Neg | Neg              |               |
| 8      | HB17A   | 8M   | F      | R                    | WDF       | 3+  | 1+               | AWOD          |
|        | HB17B   |      |        |                      | CF        | 3+  | 1+               |               |
| 9      | HB21    | 66M  | F      | R                    | CF        | 3+  | 1+               | AWOD          |
|        |         |      |        |                      | E         | Neg | Neg              |               |
| 10     | HB22    |      |        |                      | CF        | 3+  | 3+               |               |
|        |         |      |        |                      | E         | 2+  | 1+               |               |
|        |         |      |        |                      | SCU       | Neg | Neg              |               |
| 11     | HB24    | 108M | M      | R                    | E         | Neg | Neg              | AWOD          |
| 12     | HB26B   | 6M   | M      | R                    | F         | 3+  | 1+               | AWOD          |
| 13     | HB29    | 24M  | M      | R                    | CF        | 2+  | Neg              | AWOD          |
|        |         |      |        |                      | E         | Neg | Neg              |               |
|        |         |      |        |                      | Blastema  | Neg | Neg              |               |
| 14     | HB30    | 12M  | F      | R                    | Tera-gl   | Neg | 3+               | AWOD          |
| 15     | HB31    | 24M  | M      | R                    | E         | Neg | Neg              | DOD           |
|        |         |      |        |                      | CF (2%)   | 3+  | Neg              |               |
|        |         |      |        |                      | SCU/BI    | Neg | Neg              |               |
| 16     | HB32B   | 12M  | F      | R                    | CF        | 3+  | 1+               | AWOD          |
| 17     | HB34    | 36M  | M      | R                    | Tx F      | 3+  | 3+               | AWOD          |
|        |         |      |        |                      | CF        | 2+  | 1+               |               |



|    |       |     |   |   |           |     |     |       |
|----|-------|-----|---|---|-----------|-----|-----|-------|
| 18 | HB36  | 18M | M | R | WDF       | 3+  | 2+  | AWOD  |
| 19 | HB35  | 24M | F | R | WDF       | 3+  | 2+  | No FU |
|    |       |     |   |   | CF        | 2+  | Neg |       |
| 20 | HB39  | 36M | M | R | CF        | 1+  | 1+  | AWOD  |
|    |       |     |   |   | E         | Neg | Neg |       |
| 21 | HB41B | 72M | M | R | CF        | 3+  | 3+  | AWOD  |
| 22 | HB48  | 36M | M | R | CF        | 3+  | Neg | AWOD  |
|    |       |     |   |   | Tera NE   | Neg | Neg |       |
| 23 | HB49  | 24M | F | R | CF        | 2+  | 1+  | AWOD  |
|    |       |     |   |   | Mesen     | Neg | Neg |       |
|    |       |     |   |   | Cholagio  | Neg | 3+  |       |
| 24 | HB52  | 12M | M | R | PF        | 3+  | 3+  | AWOD  |
| 25 | HB53A | 6M  | F | R | Cf        | 3+  | 3+  | AWOD  |
|    |       |     |   |   | E         | Neg | 3+  |       |
| 26 | HB53B |     |   |   | WDF       | 3+  | 1+  |       |
|    |       |     |   |   | Mesen.    | Neg | Neg |       |
| 27 | HB54  | 24M | M | R | Cf        | 2+  | 1+  | AWOD  |
|    |       |     |   |   | E         | Neg | Neg |       |
| 28 | HB55  | 11M | F | R | wdf       | 1+  | Neg | AWOD  |
|    |       |     |   |   | CF        | 2+  | Neg |       |
|    |       |     |   |   | E         | Neg | Neg |       |
| 29 | HB56  | 84M | M | R | CF        | 3+  | 3+  | AWOD  |
| 30 | HB57A | 12M | M | R | WDF       | 3+  | 3+  | AWOD  |
|    | HB57B |     |   |   | WDF       | 3+  | 3+  |       |
| 31 | HB60A | 12M | F | R | CF        | 3+  | 3+  | AWOD  |
|    |       |     |   |   | E         | Neg | 2+  |       |
|    | HB60B |     |   |   | CF        | 3+  | 3+  |       |
| 32 | HB61  | 72M | M | R | WDF       | 3+  | 3+  | AWOD  |
| 33 | HB63  | 60M | F | R | CF        | 2+  | 2+  | AWOD  |
| 34 | HB65  | 43M | F | R | CF        | 3+  | 1+  | AWOD  |
|    |       |     |   |   | Blast     | Neg | Neg |       |
|    |       |     |   |   | Cholangio | Neg | 3+  |       |
|    |       |     |   |   | E         | N1+ | 1+  |       |
| 35 | HB66B | 24M | M | R | Cf        | 3+  | 3+  | AWOD  |
| 36 | HB67B | 11M | F | R | CF        | 3+  | 3+  | AWOD  |
|    |       |     |   |   | E         | Neg | 2+  |       |
|    |       |     |   |   | Blastema  | Neg | Neg |       |
| 37 | HB68B | 36M | M | R | CF        | 3+  | 2+  | AWOD  |
|    |       |     |   |   | Tera-GI   | Neg | 2+  |       |
| 38 | HB70A | 24M | F | R | CF        | 3+  | 3+  | AWOD  |
|    |       |     |   |   | E         | Neg | 2+  |       |

|    |        |     |   |   |           |     |     |       |
|----|--------|-----|---|---|-----------|-----|-----|-------|
|    | HB70B  |     |   |   | Cf        | 2+  | 2+  |       |
| 39 | HB72   | 36M | M | R | CF        | 1+  | Neg | AWOD  |
|    |        |     |   |   | E         | Neg | Neg |       |
| 40 | HB74   | 12M | M | R | CF        | 2+  | 1+  | AWOD  |
| 41 | HB75   | 24M | M | R | E         | Neg | Neg | AWOD  |
|    |        |     |   |   | CF        | 2+  | Neg |       |
| 42 | HB76   | 12M | M | R | CF        | 3+  | 3+  | AWOD  |
|    |        |     |   |   | E         | 1+  | Neg |       |
| 43 | HB79   | 12M | M | R | CF        | 2+  | 1+  | AWOD  |
| 44 | HB81A  | 12M | M | B | CF        | 3+  | 3+  | AWOD  |
|    | HB81B  |     |   | R | F         | 3+  | 1+  |       |
| 45 | HB82B  | 24M | M | R | E         | 1+  | Neg | AWOD  |
|    |        |     |   |   | CF        | 3+  | 1+  |       |
|    |        |     |   |   | Cholangio |     | 3+  |       |
|    |        |     |   |   | Blastema  | Neg | Neg |       |
|    | HB82D  |     |   |   | CF        | 2+  | 2+  |       |
|    |        |     |   |   | E         | Neg | Neg |       |
|    |        |     |   |   | Cholangio | Neg | 3+  |       |
| 46 | HB83A  | 8M  | M | R | CF        | 3+  | 3+  | AWOD  |
|    | HB83B  |     |   |   | CF        | 3+  | 1+  |       |
| 47 | HB84B  | 12M | M | R | CF        | 3+  | 1+  | AWOD  |
| 48 | HB85   | 12M | F | R | WDF       | 3+  | 3+  | AWOD  |
|    |        |     |   |   | CF        | 2+  | 1+  |       |
|    |        |     |   |   | E         | 1+  | Neg |       |
|    |        |     |   |   | Blastema  | neg | neg |       |
| 49 | HB87B  | 24M | F | R | CF        | 3+  | 1+  | AWOD  |
|    |        |     |   |   | E         | Neg | Neg |       |
| 50 | HB88B  | 60m | F | R | CF        | 3+  | 3+  | AWOD  |
| 51 | HB91B  | 12M | F | R | CF        | 2+  | w   | AWOD  |
|    |        |     |   |   | E         | Neg | w   |       |
|    |        |     |   |   | Ter-gl    | Neg | neg |       |
|    |        |     |   |   | Blastema  | Neg | neg |       |
| 52 | HB95   | 48M | M | R | WDF       | 3+  | 3+  | AWOD  |
| 53 | HB96   | 36M | F | R | F         | 3+  | 1+  | No FU |
| 54 | HB102  | 10M | M | R | CF        | 3+  | 3+  | AWOD  |
| 55 | HB104B | 12M | F | R | CF        | 2+  | 1+  | AWOD  |

**Abbreviations:** HB-hepatoblastoma; F-fetal; E-embryonal; Nal; CF-crowded fetal; WDF-well differentiated fetal; SCU-small cell undifferentiated; PF-pure fetal; Mesen-Mesenchymal; Cholangio-cholangiocarcinoma; Tera-GI- Teratoid; AWOD-alive without disease; DOD-death of disease; No FU- no follow-up; B- Biopsy; R- Resection; Neg- Negative.

**Scoring of staining:** 1+ is up to 10%; 2+ is 10-50%; 3+ = >50%.
